# Supplementary material
Source: PubMed Central journal article supplement (PMC6170682)
Supplement: NIHMS1500067-supplement-1.pdf [file NIHMS1500067-supplement-1.pdf]

Supplementary Figure 1. Meta-analyses for a) unadjusted association analysis, b) conditional analysis adjusted for the top discovery signal, c) conditional analysis adjusted for the second signal, and d) conditional analysis adjusted for both top signals.

a)

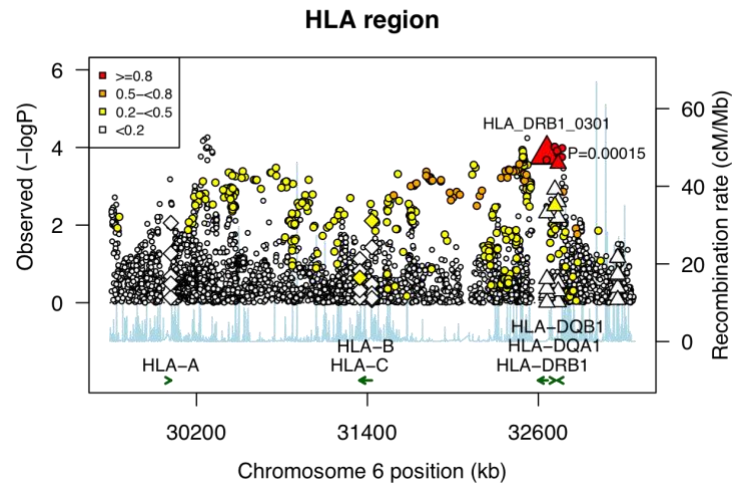

b)

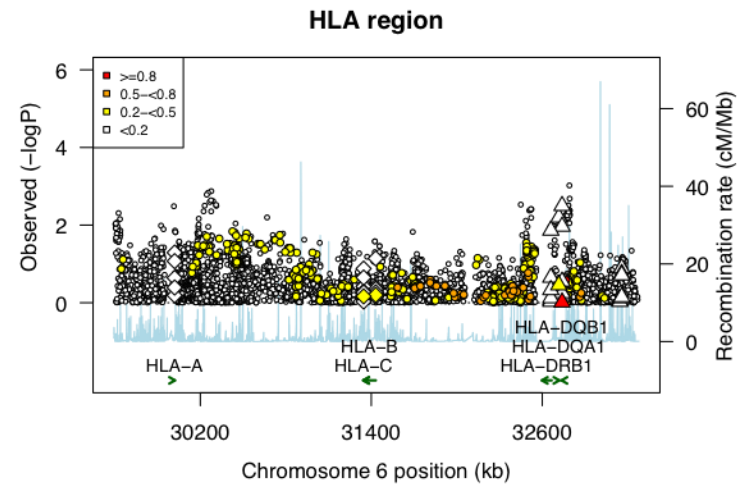

c)

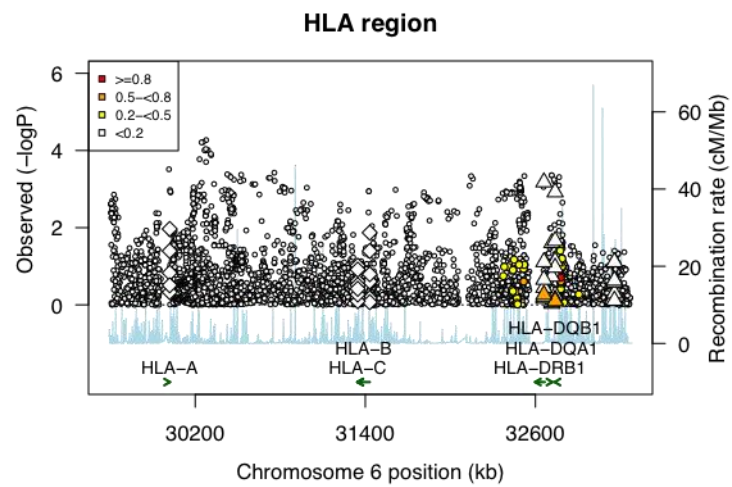

d)

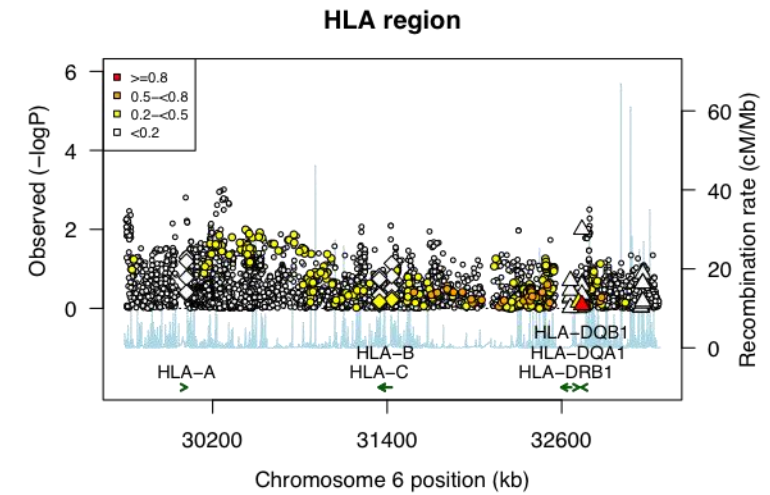

Supplementary Figure 2. Conditional meta-analyses adjusted for prior GWAS signal, rs1906953

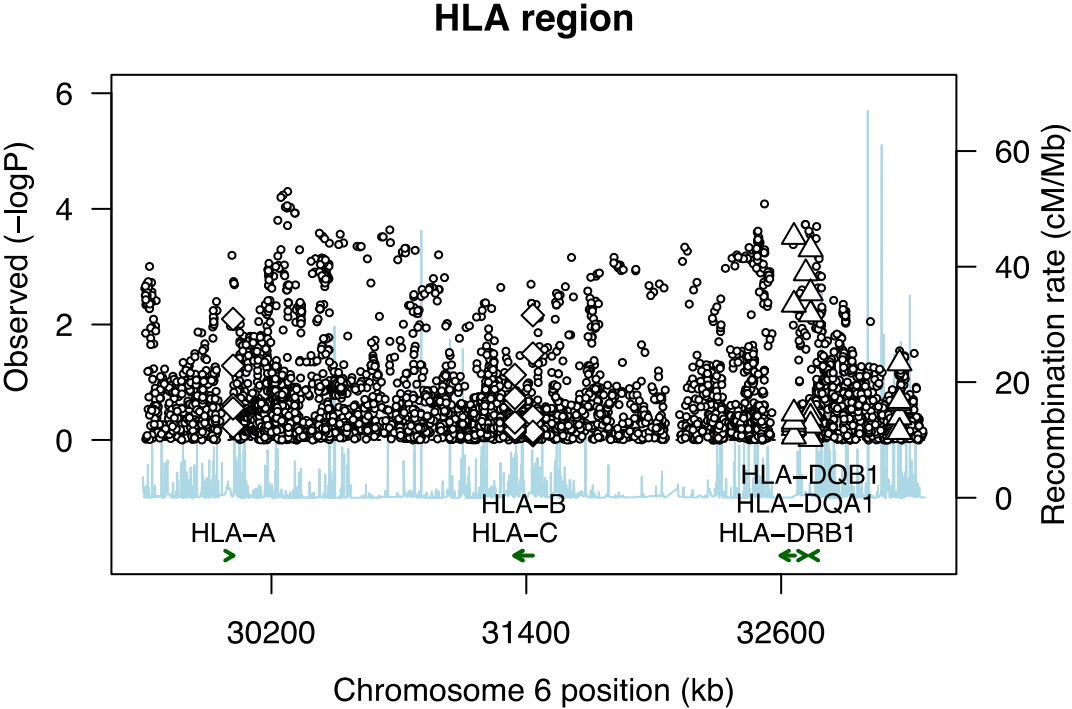

Supplementary Figure 3. Scatter plot of osteosarcoma risk for homozygous haplotype carriers of DQB1 alleles plotted on the x-axis, and heterozygous haplotype carriers plotted on the y-axis for subjects in the dbGaP dataset. Associations are shown as the odds ratios for osteosarcoma risk in carriers compared to non-carriers of the haplotype. The dashed line represents a purely additive relationship, in which heterozygotes have half the risk of homozygotes (on a log-odds scale).

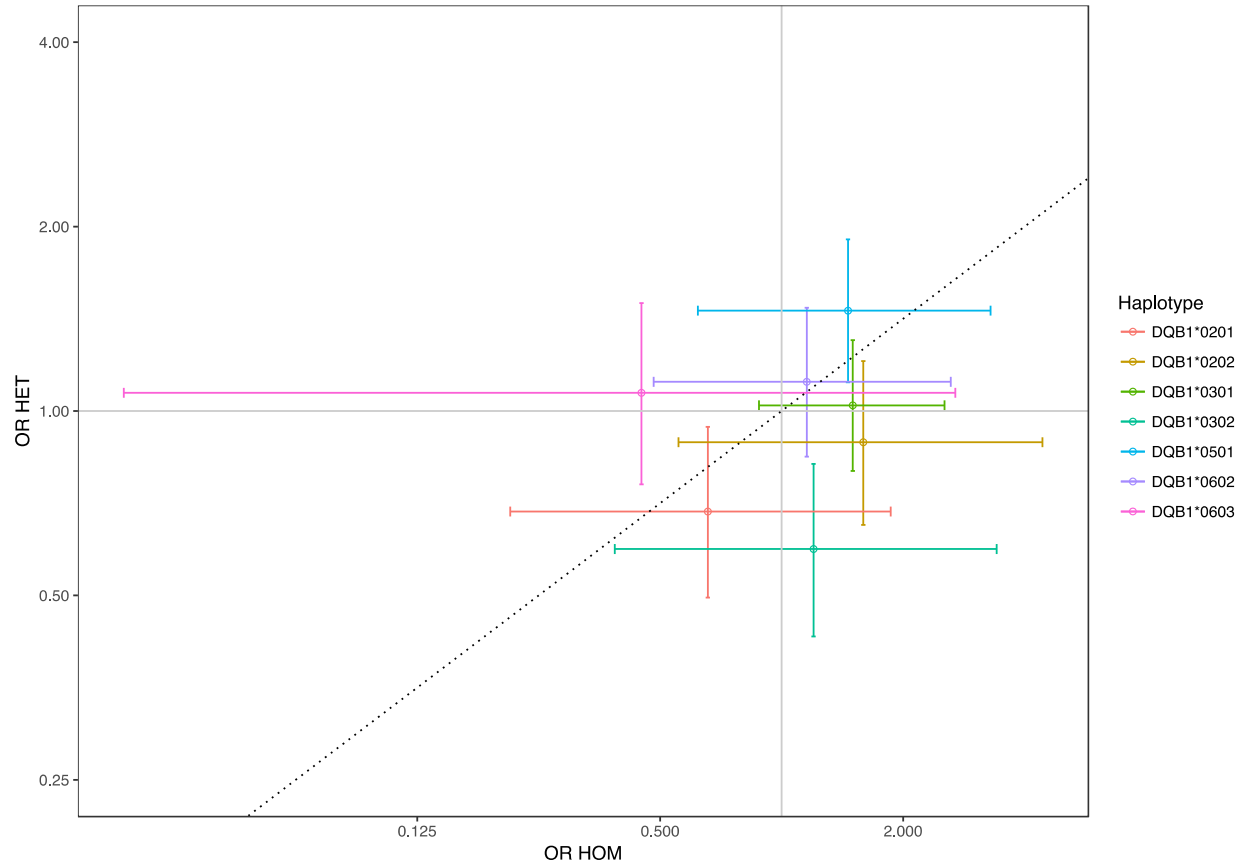

Supplementary Table 1. Demographics and clinical features of 207 pediatric osteosarcoma cases of European ancestry in the California Department of Public Health.

| Variable                | Mean (SD) or n (%) | Range    |
|-------------------------|--------------------|----------|
| Age at diagnosis        | 12.4 (3.4)         | 4.0-19.0 |
| Sex, male               | 114 (55.1%)        | -        |
| Metastasis present      | 21 (10.1%)         | -        |
| Tumor site in long bone | 183 (88.4%)        | -        |
| Undifferentiated tumor  | 111 (53.6%)        | -        |

Supplementary Table 2. HLA class I and class II allele frequencies of common variants (>0.05) in the discovery data set.

| Allele    | FRQ    | OR     | SE     | P        |
|-----------|--------|--------|--------|----------|
| A*0101    | 0.1447 | 0.7276 | 0.1766 | 0.071740 |
| A*0201    | 0.2714 | 1.3510 | 0.1293 | 0.019990 |
| A*0301    | 0.1416 | 0.6576 | 0.1838 | 0.022540 |
| A*1101    | 0.0669 | 1.1859 | 0.2216 | 0.441800 |
| A*2402    | 0.0930 | 1.2667 | 0.1927 | 0.219900 |
| C*0303    | 0.0511 | 1.3490 | 0.2398 | 0.212000 |
| C*0304    | 0.0795 | 1.1006 | 0.2089 | 0.646200 |
| C*0401    | 0.1221 | 0.9103 | 0.1762 | 0.593900 |
| C*0501    | 0.0816 | 1.0192 | 0.2080 | 0.927200 |
| C*0602    | 0.0957 | 0.9568 | 0.1914 | 0.817600 |
| C*0701    | 0.1445 | 0.9078 | 0.1698 | 0.568700 |
| C*0702    | 0.1302 | 0.9765 | 0.1681 | 0.887600 |
| C*1203    | 0.0644 | 1.0314 | 0.2378 | 0.896700 |
| B*0702    | 0.1130 | 0.9328 | 0.1817 | 0.701700 |
| B*0801    | 0.0976 | 0.5950 | 0.2251 | 0.021070 |
| B*1501    | 0.0586 | 1.2883 | 0.2425 | 0.296100 |
| B*3501    | 0.0636 | 1.0565 | 0.2423 | 0.820700 |
| B*4001    | 0.0542 | 1.2436 | 0.2454 | 0.374200 |
| B*4402    | 0.0877 | 1.1547 | 0.2010 | 0.474100 |
| DQB1*0201 | 0.1062 | 0.5124 | 0.2226 | 0.002671 |
| DRB1*0301 | 0.1055 | 0.5228 | 0.2203 | 0.003242 |
| DQA1*0501 | 0.2396 | 0.7363 | 0.1422 | 0.031320 |
| DQA1*0101 | 0.1549 | 1.3287 | 0.1502 | 0.058490 |
| DQB1*0501 | 0.1318 | 1.2506 | 0.1614 | 0.166100 |
| DQB1*0603 | 0.0624 | 0.7191 | 0.2603 | 0.205300 |
| DQA1*0103 | 0.0712 | 0.7439 | 0.2433 | 0.223900 |

---

| Allele    | FRQ    | OR     | SE     | P        |
|-----------|--------|--------|--------|----------|
| DQB1*0302 | 0.1086 | 0.7972 | 0.1944 | 0.243600 |
| DRB1*1301 | 0.0627 | 0.7428 | 0.2574 | 0.248100 |
| DRB1*0101 | 0.0865 | 1.2366 | 0.2010 | 0.290700 |
| DPB1*0101 | 0.0575 | 0.7949 | 0.2682 | 0.392000 |
| DPB1*0301 | 0.0994 | 0.8481 | 0.2107 | 0.434100 |
| DQB1*0301 | 0.1903 | 1.1019 | 0.1444 | 0.501500 |
| DRB1*1501 | 0.1174 | 1.1158 | 0.1764 | 0.534600 |
| DRB1*0401 | 0.0707 | 1.1372 | 0.2282 | 0.573200 |
| DQB1*0602 | 0.1161 | 1.1038 | 0.1776 | 0.578000 |
| DPB1*0201 | 0.1350 | 1.0992 | 0.1730 | 0.584600 |
| DPA1*0103 | 0.7886 | 0.9278 | 0.1420 | 0.597800 |
| DRB1*1101 | 0.0597 | 0.8782 | 0.2729 | 0.634100 |
| DQB1*0202 | 0.0975 | 1.0745 | 0.1806 | 0.690900 |
| DQA1*0102 | 0.1852 | 1.0584 | 0.1442 | 0.694000 |
| DRB1*0701 | 0.1327 | 0.9465 | 0.1635 | 0.736800 |
| DPB1*0401 | 0.4012 | 1.0335 | 0.1180 | 0.780200 |
| DQA1*0201 | 0.1338 | 0.9782 | 0.1624 | 0.892100 |
| DPA1*0201 | 0.1514 | 1.0132 | 0.1571 | 0.933300 |
| DPB1*0402 | 0.1286 | 0.9903 | 0.1725 | 0.954900 |
| DQA1*0301 | 0.1834 | 0.9951 | 0.1489 | 0.973900 |

---

Supplementary Table 3. Pairwise correlation of variants of 3 genes, DRB1, DQA1, and DQB1, that were identified from the top association signals, with green highlighting HLA alleles of the first signal of DRB1\*0301, DQA1\*0501, and DQB1\*0201, and the blue highlighting HLA alleles of the second signal of DRB1\*0101, DQA1\*0101, and DQB1\*0501.

DRB1/DQA1:

|           | DRB1*0101 | DRB1*0301 | DRB1*0401 | DRB1*0701 | DRB1*1101 | DRB1*1301 | DRB1*1501 |
|-----------|-----------|-----------|-----------|-----------|-----------|-----------|-----------|
| DQA1*0101 | 0.981     | -0.103    | -0.169    | -0.183    | -0.134    | -0.096    | -0.209    |
| DQA1*0102 | -0.216    | -0.151    | -0.187    | -0.281    | -0.071    | -0.158    | 0.978     |
| DQA1*0103 | -0.088    | -0.167    | -0.023    | -0.196    | -0.165    | 0.962     | -0.134    |
| DQA1*0201 | -0.193    | -0.295    | -0.245    | 0.993     | -0.110    | -0.180    | -0.280    |
| DQA1*0301 | -0.165    | -0.100    | 0.980     | -0.229    | -0.141    | -0.014    | -0.183    |
| DQA1*0501 | -0.166    | 0.719     | -0.161    | -0.324    | 0.504     | -0.256    | -0.225    |

DQA1/DQB1:

DRB1/DQB1:

|           | DRB1*0101 | DRB1*0301 | DRB1*0401 | DRB1*0701 | DRB1*1101 | DRB1*1301 | DRB1*1501 |
|-----------|-----------|-----------|-----------|-----------|-----------|-----------|-----------|
| DQB1*0201 | -0.124    | 0.989     | -0.097    | -0.251    | -0.208    | -0.197    | -0.214    |
| DQB1*0202 | -0.188    | -0.251    | -0.229    | 0.995     | -0.085    | -0.178    | -0.239    |
| DQB1*0301 | -0.150    | -0.200    | 0.282     | -0.174    | 0.756     | -0.116    | -0.204    |
| DQB1*0302 | -0.118    | -0.102    | 0.716     | -0.159    | -0.084    | -0.050    | -0.118    |
| DQB1*0501 | 0.964     | -0.120    | -0.177    | -0.183    | -0.120    | -0.118    | -0.182    |
| DQB1*0602 | -0.210    | -0.204    | -0.197    | -0.239    | -0.104    | -0.150    | 0.970     |
| DQB1*0603 | -0.109    | -0.185    | -0.035    | -0.178    | -0.176    | 0.975     | -0.128    |

DQA1/DQB1:

|           | DQA1*0101 | DQA1*0102 | DQA1*0103 | DQA1*0201 | DQA1*0301 | DQA1*0501 |
|-----------|-----------|-----------|-----------|-----------|-----------|-----------|
| DQB1*0201 | -0.147    | -0.126    | -0.153    | -0.158    | -0.162    | 0.572     |
| DQB1*0202 | -0.188    | -0.142    | -0.115    | 1.000     | -0.222    | -0.237    |
| DQB1*0301 | -0.217    | -0.235    | -0.149    | -0.198    | 0.109     | 0.505     |
| DQB1*0302 | -0.161    | -0.183    | -0.092    | -0.170    | 0.785     | -0.231    |
| DQB1*0501 | 0.994     | -0.183    | -0.122    | -0.191    | -0.205    | -0.264    |
| DQB1*0602 | -0.200    | 0.983     | -0.097    | -0.143    | -0.212    | -0.259    |
| DQB1*0603 | -0.126    | -0.082    | 0.982     | -0.112    | -0.116    | -0.225    |

Supplementary Table 4. Imputation accuracy in the discovery and replication datasets for nominally significant HLA class II alleles associated with osteosarcoma risk.

| HLA allele | R <sup>2</sup> Discovery | R <sup>2</sup> Replication |
|------------|--------------------------|----------------------------|
| DRB1*0301  | 0.998                    | 0.995                      |
| DQA1*0501  | 0.999                    | 0.999                      |
| DQB1*0201  | 0.996                    | 0.990                      |
| DRB1*0101  | 0.989                    | 0.972                      |
| DQA1*0101  | 1.00                     | 1.00                       |
| DQB1*0501  | 0.997                    | 0.998                      |
| DQB1*0302  | 1.00                     | 0.999                      |



Supplementary Table 5. Interaction effect estimates and *P*-values for the model improvement with the inclusion of the interaction term between *DRB1\*0301* and each class II allele.

| Haplotype | Interaction OR<br>(95% CI) | Interaction<br><i>P</i> <sub>improve</sub> |
|-----------|----------------------------|--------------------------------------------|
| DRB1*0101 | 0.44 (0.16-1.10)           | 8.16E-02                                   |
| DRB1*0401 | 0.75 (0.28-1.90)           | 5.57E-01                                   |
| DRB1*0701 | 1.09 (0.57-2.06)           | 7.98E-01                                   |
| DRB1*1101 | 0.72 (0.22-2.22)           | 5.72E-01                                   |
| DRB1*1301 | 4.44 (1.66-12.3)           | 2.99E-03                                   |
| DRB1*1501 | 1.43 (0.71-2.84)           | 3.10E-01                                   |
| DQA1*0101 | 0.45 (0.21-0.92)           | 2.94E-02                                   |
| DQA1*0102 | 1.90 (1.03-3.48)           | 4.11E-02                                   |
| DQA1*0103 | 4.40 (1.68-11.9)           | 2.49E-03                                   |
| DQA1*0201 | 1.09 (0.57-2.07)           | 7.88E-01                                   |
| DQA1*0301 | 0.74 (0.37-1.44)           | 3.78E-01                                   |
| DQA1*0501 | 0.70 (0.40-1.15)           | 1.63E-01                                   |
| DQB1*0201 | 0.96 (0.51-1.68)           | 8.84E-01                                   |
| DQB1*0202 | 0.96 (0.44-2.08)           | 9.23E-01                                   |
| DQB1*0301 | 0.52 (0.28-0.96)           | 3.54E-02                                   |
| DQB1*0302 | 0.70 (0.25-1.80)           | 4.75E-01                                   |
| DQB1*0501 | 0.51 (0.22-1.14)           | 1.01E-01                                   |
| DQB1*0602 | 1.49 (0.73-3.01)           | 2.74E-01                                   |
| DQB1*0603 | 3.96 (1.52-10.5)           | 4.76E-03                                   |
| DPA1*0103 | 1.02 (0.67-1.56)           | 9.36E-01                                   |
| DPA1*0201 | 0.91 (0.58-1.44)           | 6.97E-01                                   |
| DPB1*0101 | 0.88 (0.45-1.69)           | 6.95E-01                                   |
| DPB1*0201 | 1.26 (0.70-2.24)           | 4.39E-01                                   |
| DPB1*0301 | 0.87 (0.44-1.66)           | 6.79E-01                                   |
| DPB1*0401 | 0.82 (0.57-1.18)           | 2.88E-01                                   |
| DPB1*0402 | 1.32 (0.75-2.26)           | 3.28E-01                                   |

Supplementary Table 6. Association analyses between HLA intragenic SNPs and osteosarcoma, stratified by dataset and combined in meta-analysis, for SNPs with meta-analysis p-value  $<1.0 \times 10^{-4}$ .

| HLA intragenic SNP | Discovery |          | Replication |          | Meta-analysis |          | I <sup>2a</sup> (%) |
|--------------------|-----------|----------|-------------|----------|---------------|----------|---------------------|
|                    | OR        | P        | OR          | P        | OR            | P        |                     |
| rs929157           | 0.55      | 4.95E-03 | 0.64        | 4.11E-03 | 0.61          | 6.82E-05 | 0                   |
| rs2187668          | 0.52      | 2.66E-03 | 0.67        | 8.00E-03 | 0.61          | 9.72E-05 | 0                   |
| rs2284189          | 0.52      | 2.65E-03 | 0.67        | 8.00E-03 | 0.61          | 9.68E-05 | 0                   |
| rs2517612          | 0.54      | 3.75E-03 | 0.64        | 4.06E-03 | 0.60          | 5.49E-05 | 0                   |
| rs2523720          | 0.58      | 7.80E-03 | 0.64        | 4.06E-03 | 0.61          | 9.70E-05 | 0                   |
| rs2844785          | 0.55      | 4.35E-03 | 0.64        | 4.19E-03 | 0.60          | 6.26E-05 | 0                   |
| rs3129890          | 0.81      | 1.15E-01 | 0.65        | 9.14E-05 | 0.71          | 5.74E-05 | 38.0                |

<sup>a</sup>I<sup>2</sup> heterogeneity index
